# Supplementary material for: Transcriptome analysis of haploid male gametophyte development in Arabidopsis
Source: PubMed Central journal article supplement (PMC545776; doi:10.1186/gb-2004-5-11-r85), 2004-10-27

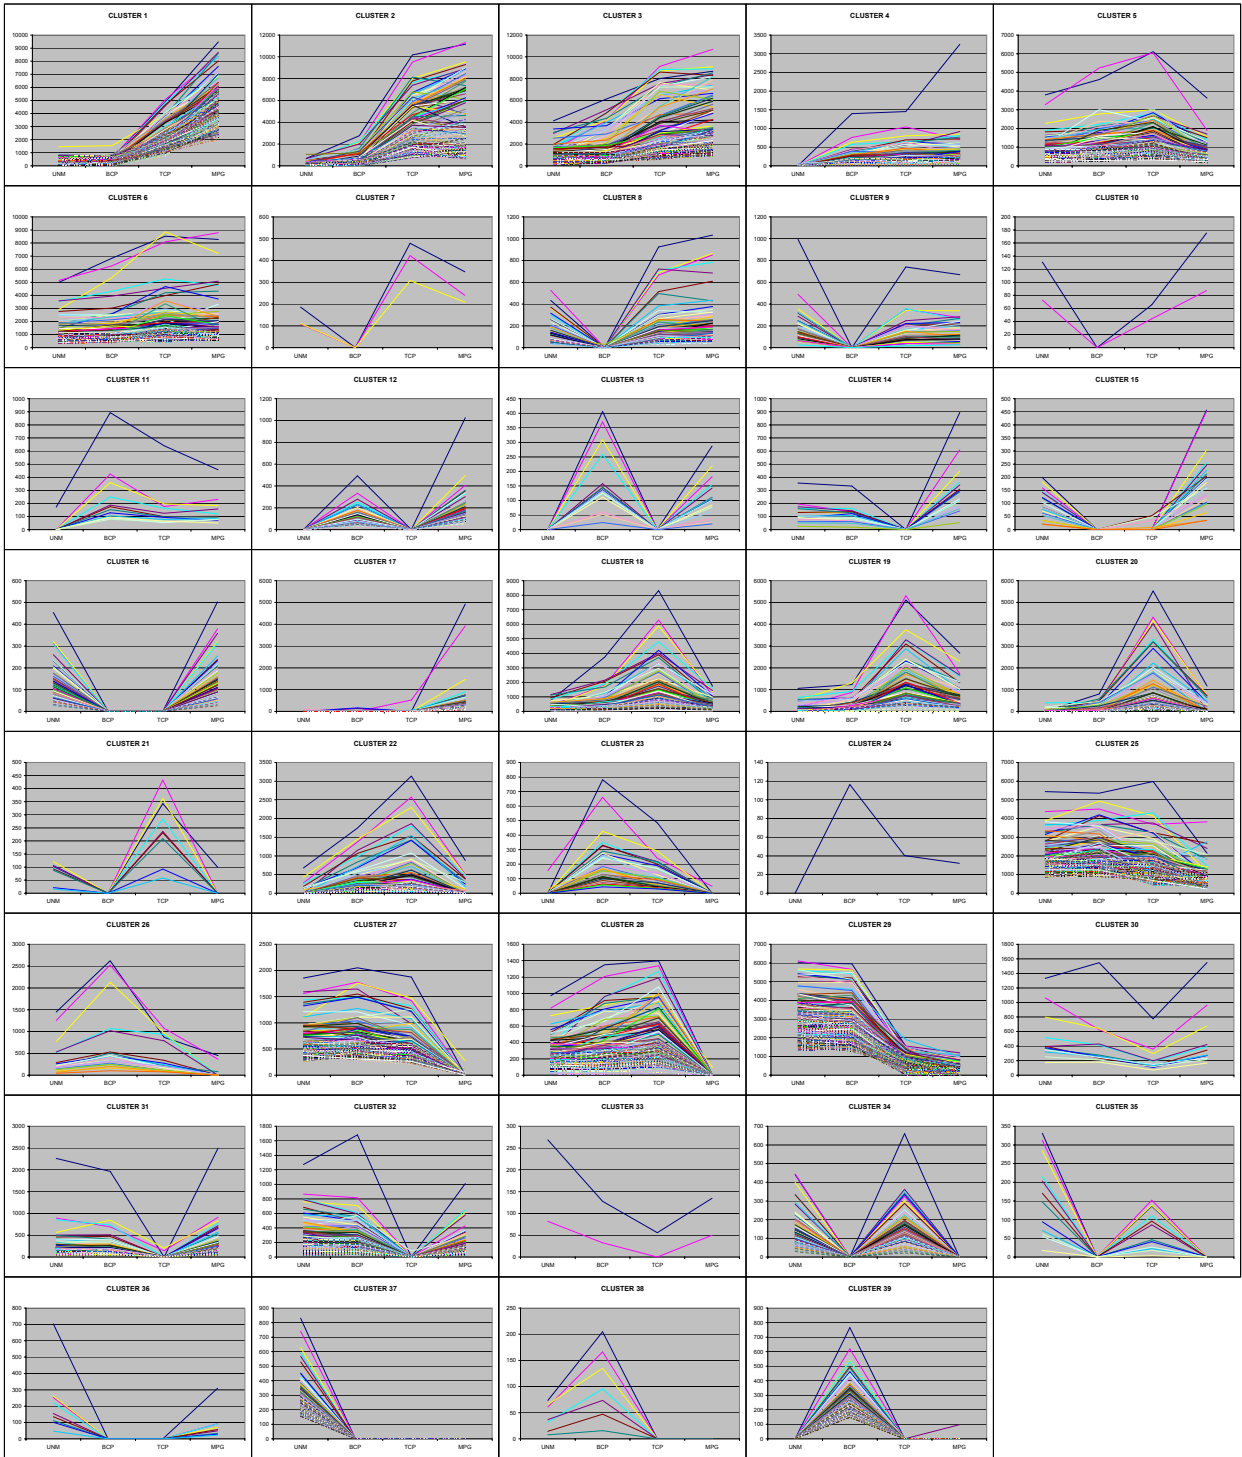

Supplement: gb-2004-5-11-r85-s2.pdf [file gb-2004-5-11-r85-s2.pdf]
